# Supplementary material for: Two-Stage Bio-Hydrogen and Polyhydroxyalkanoate Production: Upcycling of Spent Coffee Grounds
Source: MDPI journal article supplement (doi:10.3390/polym15030681), 2023-01-29
Supplement: s1 [file s1]

# Two-stage Bio-hydrogen and Polyhydroxyalkanoate Production: Upcycling of Spent Coffee Grounds

Beom-Jung Kang <sup>1,†</sup>, Jong-Min Jeon <sup>1,†</sup>, Shashi Kant Bhatia <sup>2</sup>, Do-Hyung Kim <sup>3</sup>, Yung-Hun Yang <sup>2</sup>, Sangwon Jung <sup>4</sup> and Jeong-Jun Yoon <sup>1,\*</sup>

<sup>1</sup> Green & Sustainable Materials R&D Department, Korea Institute of Industrial Technology (KITECH), Chunan-si 31056, Republic of Korea

<sup>2</sup> Department of Biological Engineering, Konkuk University, Seoul 27478, Republic of Korea

<sup>3</sup> Sustainable Technology and Wellness R&D Group, Korea Institute of Industrial Technology (KITECH), Jeju-si 63243, Republic of Korea

<sup>4</sup> Department of Bio and Fermentation Convergence Technology, Kookmin University, Seoul 02707, Republic of Korea

\* Correspondence: jjyoon@kitech.re.kr; Tel.: +82-41-589-8266

† These authors contributed equally to this work.

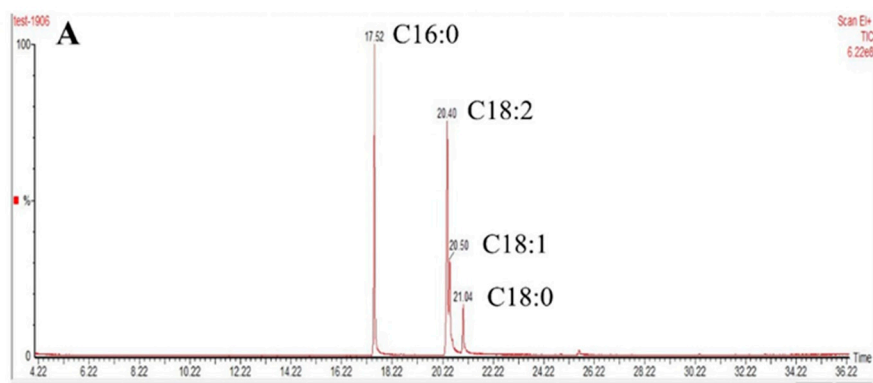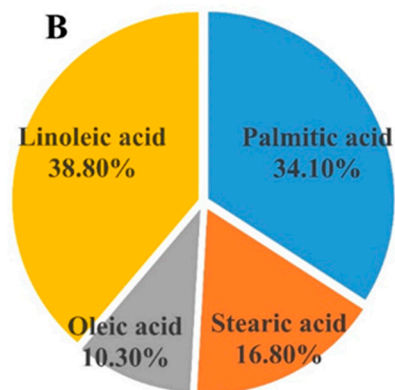

**Figure S1.** Qualitative and quantitative analysis of spent coffee grounds oil (A) GC/MS graph of qualitative analysis (B) composition of fatty acids in SCGs oil.

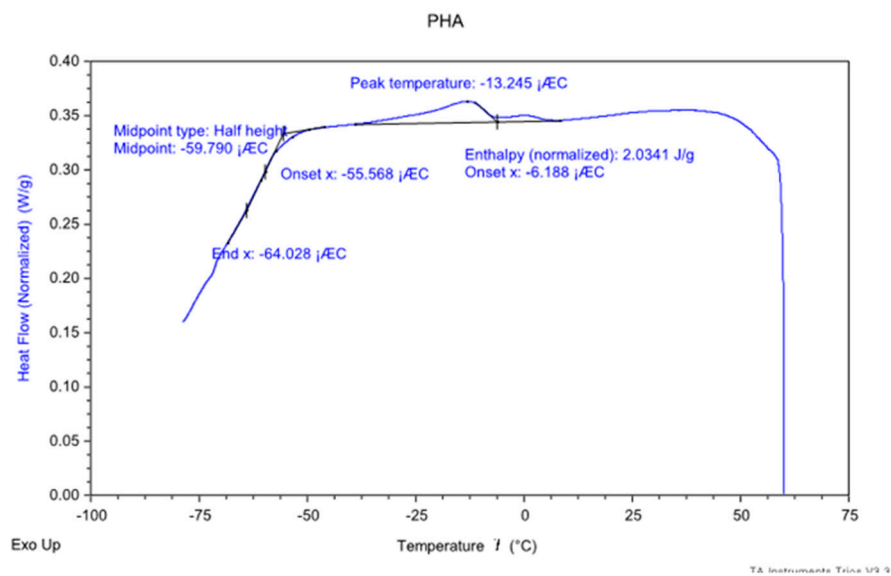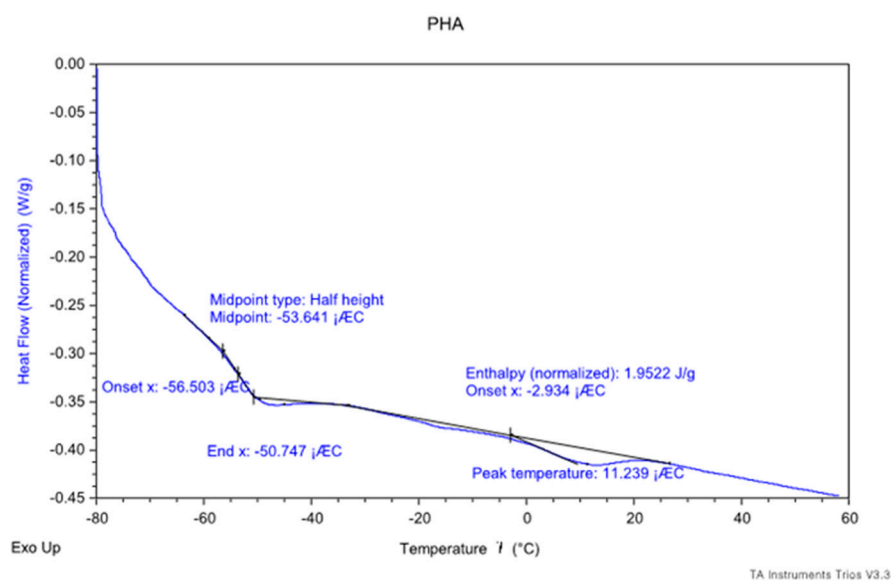

**Figure S2.** Differential scanning calorimetry results of mcl-PHA.

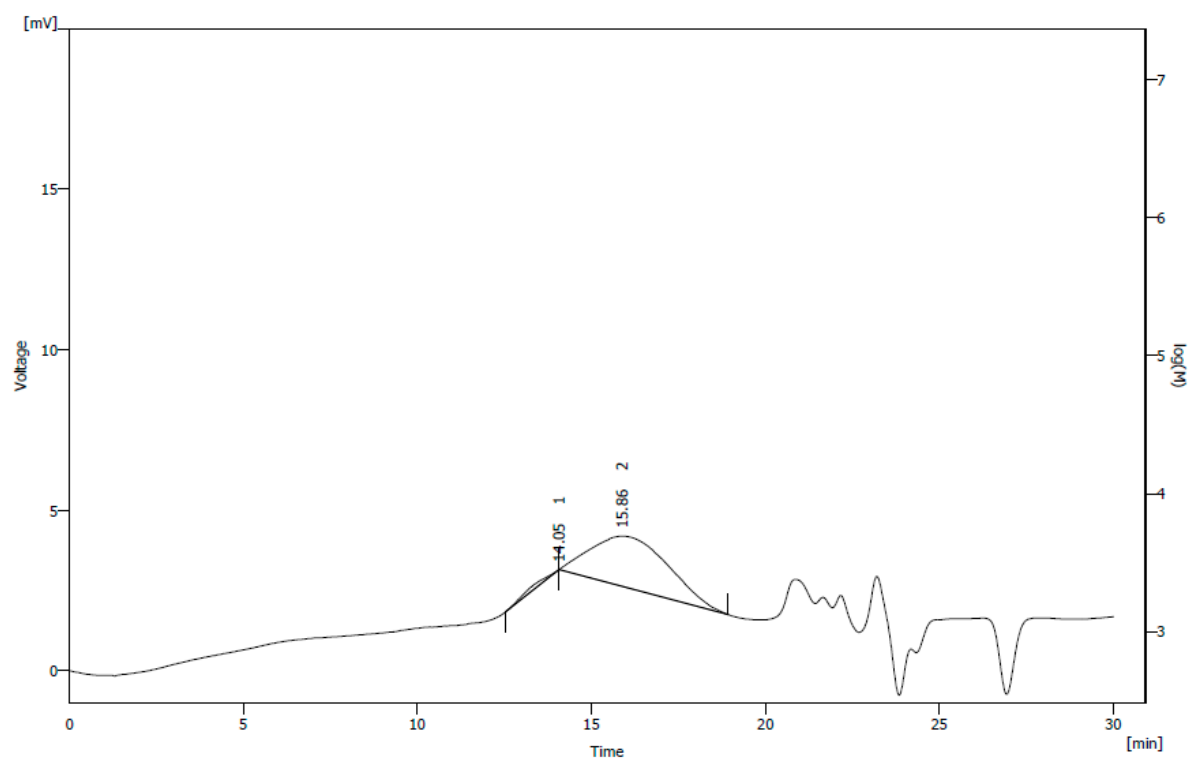

**Figure S3.** Gel permeation chromatography result of mcl-PHA.
